# Supplementary material for: Non-fatal injuries in rural Burkina Faso amongst older adults, disease burden and health system responsiveness: a cross-sectional household survey
Source: PubMed Central journal article supplement (PMC8166610; doi:10.1136/bmjopen-2020-045621), 2021-05-28

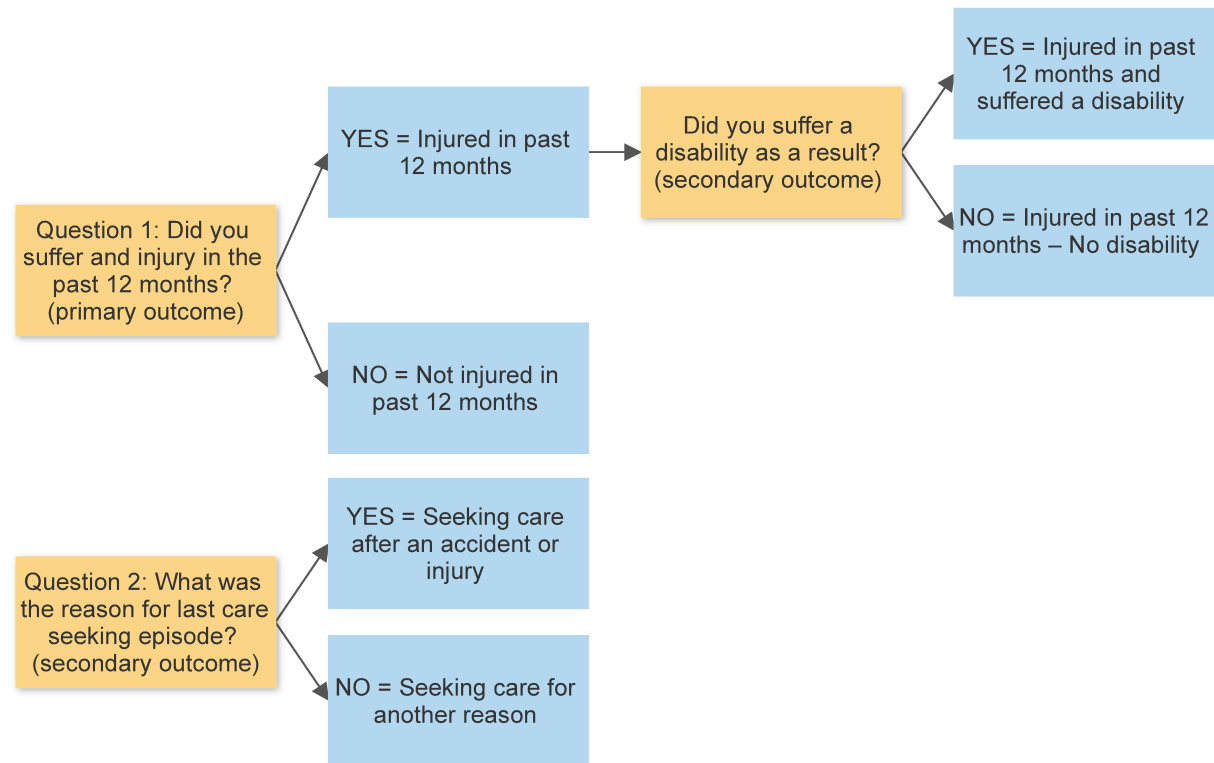

Supplement: bmjopen-2020-045621supp001.pdf [file bmjopen-2020-045621supp001.pdf]
