# Supplementary material for: Non-fatal injuries in rural Burkina Faso amongst older adults, disease burden and health system responsiveness: a cross-sectional household survey
Source: PubMed Central journal article supplement (PMC8166610; doi:10.1136/bmjopen-2020-045621), 2021-05-28
Supplement: bmjopen-2020-045621supp002.pdf [file bmjopen-2020-045621supp002.pdf]

## Appendices

**Appendix table 1 - Mechanism of injury according to wealth quintile, for all those injured in past 12 months with number of males in brackets.**

| Wealth Quintile | Fall N (n of males) | Fall from motorcycle or bicycle N (n of males) | Struck / hit by object N (n of males) | Cut / stabbed N (n of males) | Gunshot N (n of males) | Fire / Heat Burn N (n of males) | Poisoning N (n of males) | Animal bite N (n of males) | Other N (n of males) |
|-----------------|---------------------|------------------------------------------------|---------------------------------------|------------------------------|------------------------|---------------------------------|--------------------------|----------------------------|----------------------|
| 1               | 6 (4)               | 3 (3)                                          | 10 (7)                                | 11 (5)                       | 1 (1)                  | 1 (0)                           | 0 (0)                    | 2 (1)                      | 4 (2)                |
| 2               | 5 (1)               | 6 (5)                                          | 17 (13)                               | 2 (1)                        | 2 (2)                  | 1 (1)                           | 3 (0)                    | 1 (1)                      | 0 (0)                |
| 3               | 9 (5)               | 12 (6)                                         | 12 (8)                                | 15 (11)                      | 0 (0)                  | 0 (0)                           | 1 (1)                    | 0 (0)                      | 3 (2)                |
| 4               | 3 (3)               | 13 (10)                                        | 20 (11)                               | 5 (5)                        | 0 (0)                  | 2 (0)                           | 0 (0)                    | 2 (2)                      | 3 (1)                |
| 5               | 3 (2)               | 19 (15)                                        | 17 (9)                                | 13 (8)                       | 1 (0)                  | 1 (0)                           | 0 (0)                    | 3 (2)                      | 0 (0)                |
| Total           | 26 (15)             | 53 (39)                                        | 76 (48)                               | 46 (30)                      | 4 (3)                  | 5 (1)                           | 4 (1)                    | 8 (6)                      | 10 (5)               |

**Appendix table 2 - Binary logistic regression for falling from a motorcycle or bicycle and wealth quintile.**

|                  | Odds Ratio | 95% C.I.     | P Value |
|------------------|------------|--------------|---------|
| Quintile 1 (ref) |            |              |         |
| Quintile 2       | 2.26       | 0.52 - 9.80  | 0.277   |
| Quintile 3       | 3.50       | 0.91 - 13.42 | 0.068   |
| Quintile 4       | 4.33       | 1.14 - 16.55 | 0.032   |
| Quintile 5       | 5.83       | 1.59 - 21.43 | 0.008   |

**Appendix table 3 - Opinion and experience of healthcare received by those seeking care following an injury and those seeking care for another reason at last visit.**

|                                                                                                      | Seeking care after an accident or injury % (95% CI)<br>Number responders (N) = 119<br>unless otherwise stated | Seeking care for another reason n % (95% CI)<br>Number responders (N) = 2882 unless otherwise stated |
|------------------------------------------------------------------------------------------------------|---------------------------------------------------------------------------------------------------------------|------------------------------------------------------------------------------------------------------|
| <b>Opinion of care received</b>                                                                      |                                                                                                               |                                                                                                      |
| Confident that would receive effective treatment if very sick tomorrow                               |                                                                                                               |                                                                                                      |
| Very or somewhat confident                                                                           | 95.8 (90.5 – 98.2)                                                                                            | 93.5 (92.6 – 94.4)                                                                                   |
| Not very or not at all confident                                                                     | 4.2 (1.8 – 9.5)                                                                                               | 6.5 (5.6 – 7.4)                                                                                      |
| Overall view of national healthcare system                                                           |                                                                                                               |                                                                                                      |
| Needs to be rebuilt or major changes needed                                                          | 46.2 (37.5 – 55.2)                                                                                            | 38.0 (36.3 – 39.8) (N=2909)                                                                          |
| Only minor changes needed                                                                            | 53.8 (44.9 – 62.5)                                                                                            | 62.0 (60.2 – 63.7) (N=2909)                                                                          |
| Overall how well did received care meet health needs at last visit?                                  |                                                                                                               |                                                                                                      |
| Excellent, very good or good                                                                         | 90.0 (83.2 – 94.1)                                                                                            | 94.4 (93.5 – 95.2)                                                                                   |
| Fair or poor                                                                                         | 10.0 (5.9 – 16.8)                                                                                             | 5.5 (4.8 – 6.5)                                                                                      |
| Do you trust in the skills and abilities of the HCW at the facility?                                 |                                                                                                               |                                                                                                      |
| Very much, quite a bit or some.                                                                      | 96.6 (91.7 – 98.7)                                                                                            | 97.7 (97.1 – 98.2) (N=2879)                                                                          |
| Very little or not at all                                                                            | 3.4 (1.3 – 8.3)                                                                                               | 2.3 (1.8 – 2.9) (N=2879)                                                                             |
| What is your opinion of the care provider's knowledge and skills?                                    |                                                                                                               |                                                                                                      |
| Excellent, very good or good                                                                         | 95.0 (89.4 – 97.7)                                                                                            | 94.5 (93.3 – 95.0) (N=2873)                                                                          |
| Fair or poor                                                                                         | 5.0 (2.3 – 10.6)                                                                                              | 5.5 (5.0 – 6.7) (N=2873)                                                                             |
| What do you think about the provider's ability to explain things in a way that you could understand? |                                                                                                               |                                                                                                      |

|                                                                                                   |                                                                                                |                            |                                  |
|---------------------------------------------------------------------------------------------------|------------------------------------------------------------------------------------------------|----------------------------|----------------------------------|
|                                                                                                   | Excellent, very good or good                                                                   | 95.0 (89.4 – 97.7)         | 94.2 (93.3 – 95.0) (N=2864)      |
|                                                                                                   | Fair or poor                                                                                   | 5.0 (2.3 – 10.6)           | 5.8 (5.0 – 6.7) (N=2864)         |
| How easy or difficult was it for you to follow the provider's advice?                             |                                                                                                |                            |                                  |
|                                                                                                   | Very Easy, easy or fair                                                                        | 99.2 (95.4 – 99.9)         | 97.8 (97.3 – 98.3) (N=2877)      |
|                                                                                                   | Hard or very hard                                                                              | 0.8 (0.2 – 4.6)            | 2.2 (1.7 – 2.8) (N=2877)         |
| What do you think about your experience of being involved in making decisions for your treatment? |                                                                                                |                            |                                  |
|                                                                                                   | Excellent, very good or good                                                                   | 74.3 (65.6 – 81.5) (N=113) | 77.7 (76.1 – 79.2) (N=2748)      |
|                                                                                                   | Fair or poor                                                                                   | 25.7 (18.5 – 34.4) (N=113) | 22.3 (20.8 – 23.9) (N=2748)      |
| <b>Experience of care processes</b>                                                               |                                                                                                |                            |                                  |
|                                                                                                   | Did care provider refer to another facility? - Yes                                             | 9.3 (5.2 – 15.8)           | 5.4 (4.6 – 6.3) (N=2872)         |
|                                                                                                   | Did care provider ask for further tests? - Yes                                                 | 10.3 (6.0 – 17.1) (N=117)  | 7.8 (6.9 – 8.8) (N=2859)         |
|                                                                                                   | Did the care provider ask you to come back? - Yes                                              | 81.4 (72.7 – 86.8)         | 51.8 (50.0 – 53.6) (N=2881)      |
|                                                                                                   | Had to borrow or sell to pay for health care episode? - Yes                                    | 21.2 (14.7 – 29.7) (N=113) | 14.3 (13.0 – 15.6) (N=2881)      |
|                                                                                                   | How long did you wait before your consultation (minutes)? (Median and IQR) (Mann-Witney U)     | 10 (5-15) (N=118)          | 20 (10-30) (N=2885)<br>P = 0.002 |
|                                                                                                   | How much time did you spend with the care provider (minutes)? (Median and IQR) (Mann-Witney U) | 20 (15-30) (N=118)         | 15 (20-25) (N=2885)<br>P = 0.002 |
